# Supplementary material for: Recombinant Decoy Exhibits Broad Protection against Omicron and Resistance Potential to Future Variants
Source: MDPI journal article supplement (doi:10.3390/ph15081002), 2022-08-15
Supplement: s1 [file s1]

## VOC

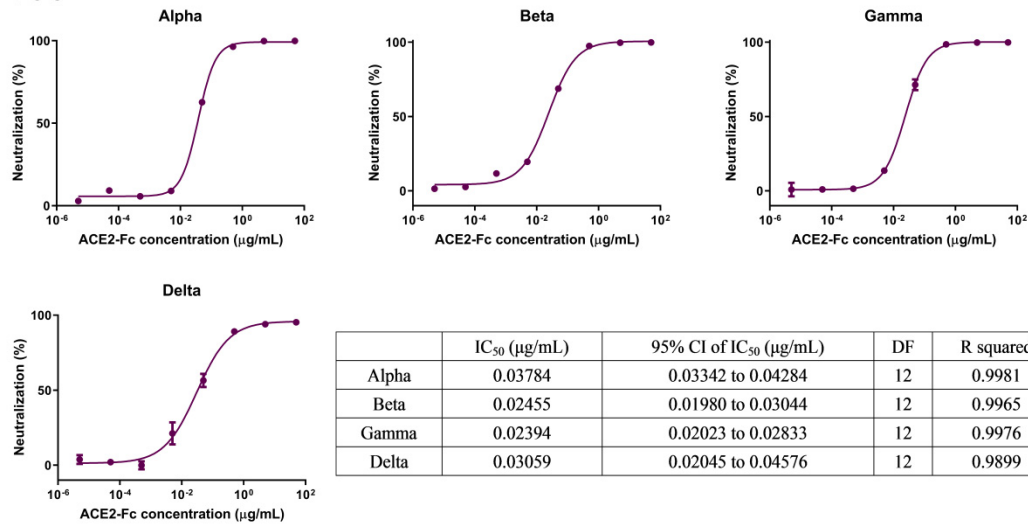

## VOI

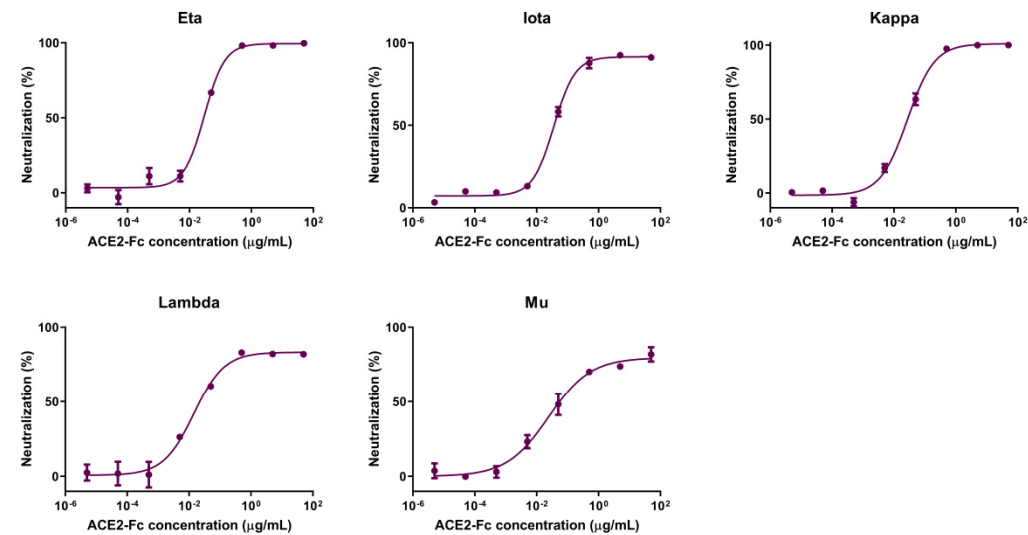

## SARS-CoV

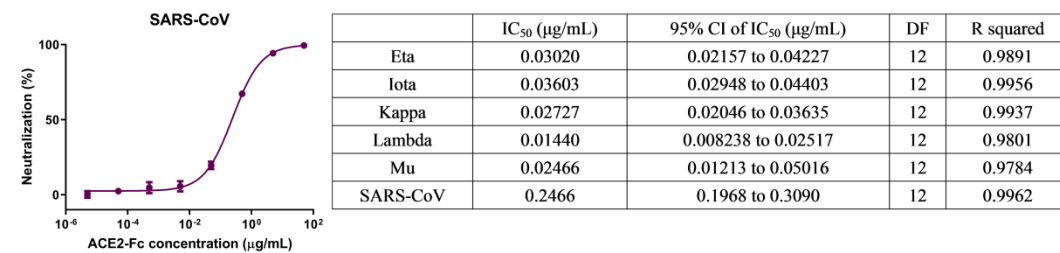

**Figure S1. ACE2-Fc efficiently neutralized VOCs/VOIs as well as SARS-CoV-1.** Lentiviral particles pseudotyped with S protein of VOCs/VOIs or SARS-CoV were used to evaluate their susceptibility to ACE2-Fc neutralization. Neutralization ratios were calculated as described in Figure 1 (mean±SD, N=2). IC<sub>50</sub> values were calculated by four parameter nonlinear regression fitting.

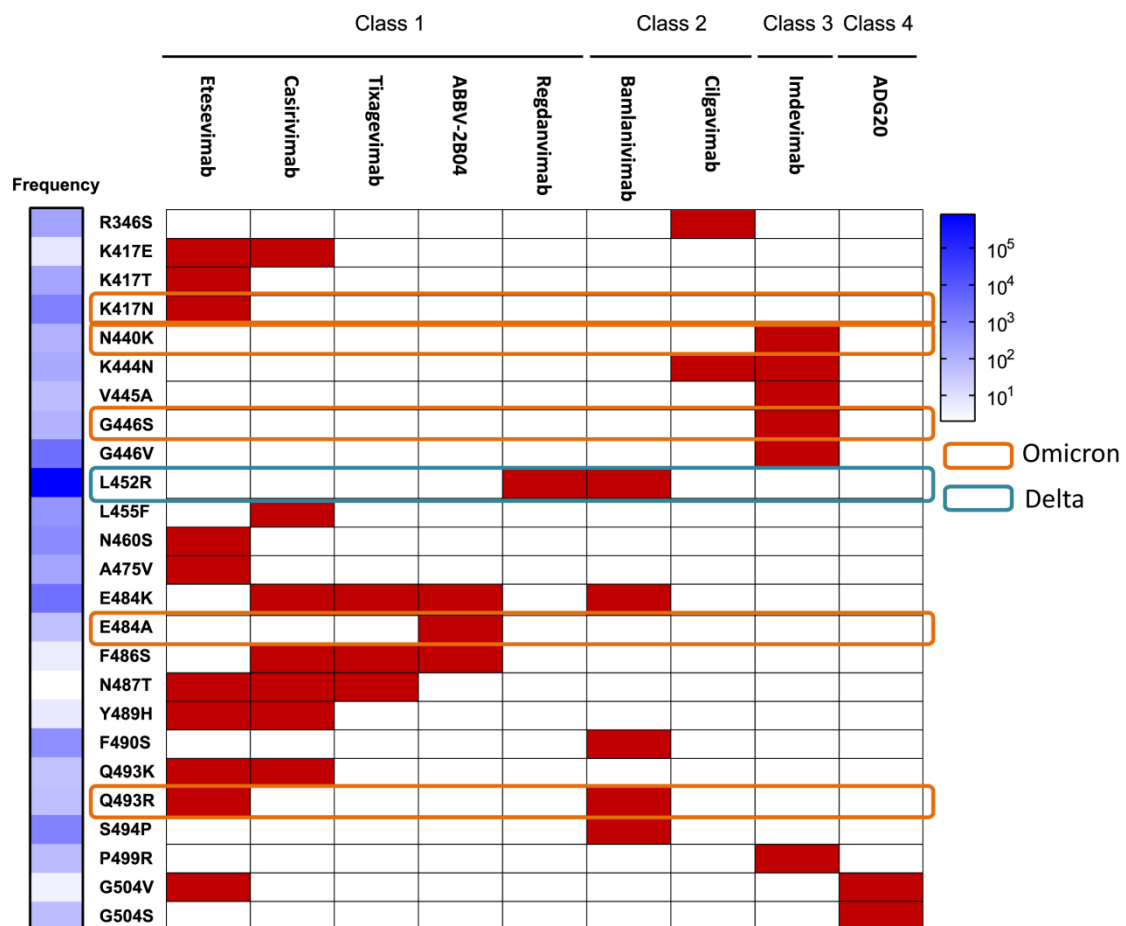

**Figure S2.** Summary of single amino-acid mutations that were selected upon the selective pressure of antibody therapeutics either EUA authorized or in clinical trials. Red boxes indicate escape. Escape information of each antibody were obtained from these references: Etesevimab [1], Casirivimab [1-4], Tixagevimab [5], ABBV-2B04 [6], Regdanvimab [7], Bamlanivimab [3], Cilgavimab [5], Imdevimab [1,2], and ADG20 [3].

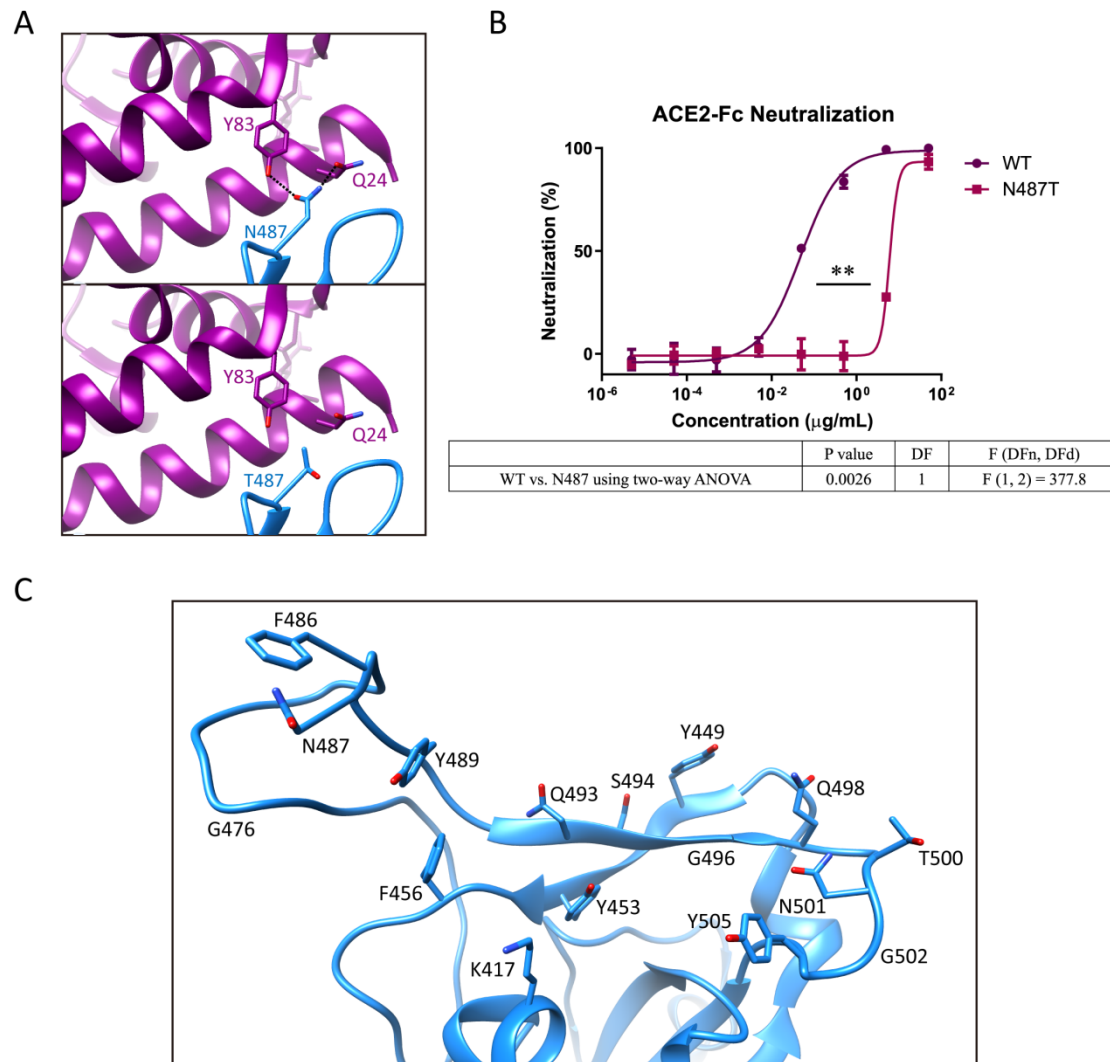

**Figure S3. Regardless of sensitive to mutations on N487, high concentration of ACE2-Fc neutralized N487T variant. (A)** Structural analysis based on published high-resolution ACE2-RBD complex structure model (see Materials and Methods) showed there are two hydrogen bonds formed between N487 of RBD and Y83 or Q24 of ACE2. However, T487 lost interaction with ACE2. **(B)** ACE2-Fc neutralized N487T variant. Neutralization ratios are displayed as mean $\pm$ SD, N=2. Comparison was carried out using two-way ANOVA statistical analysis. \*\*p<0.01. **(C)** ACE2-RBD interface has a large attachment area and quantities of interacting residues. Residues on RBD within 4 Å distance from ACE2 were analyzed.

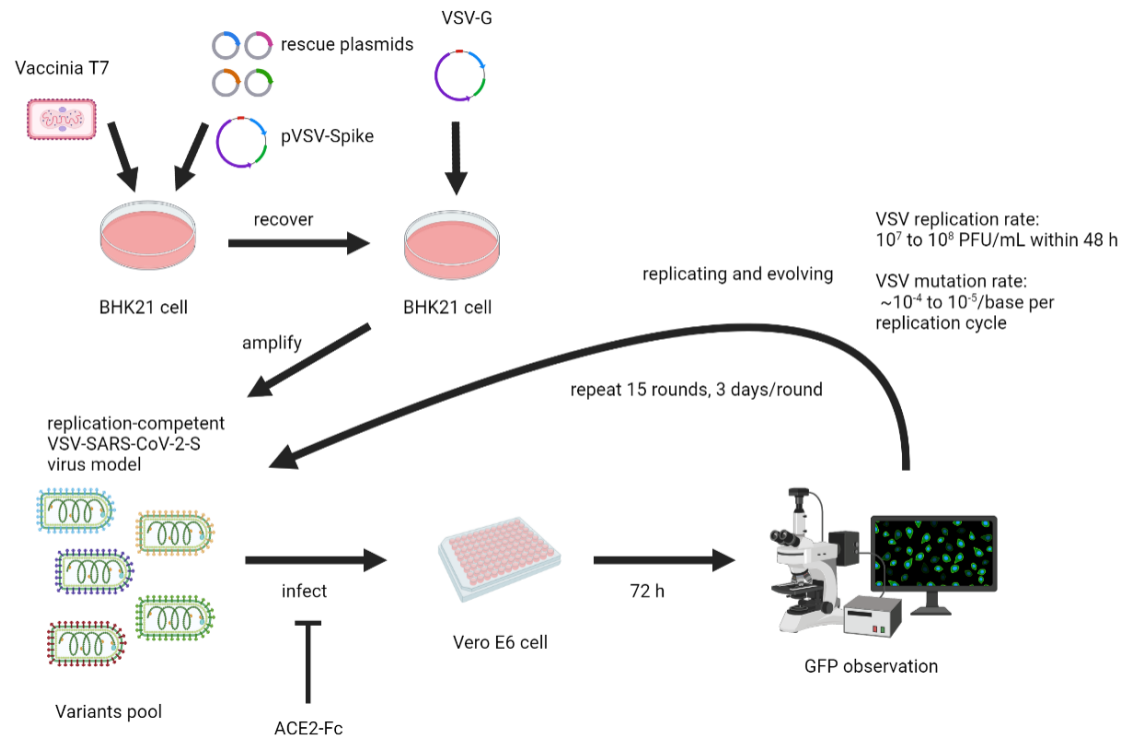

**Figure S4.** Workflow of generation of replication-competent VSV-SARS-CoV-2-S virus model and subsequent evolution experiment. See Materials and Methods part for detailed methodology description.

**A**

| Position    | 74      | 79     | 247    | 417     | 475    | 486   | 682    | 685    | 685    | 687   | 687   | 754    | 808   | 813     | 982    | 1081   | 1181  |
|-------------|---------|--------|--------|---------|--------|-------|--------|--------|--------|-------|-------|--------|-------|---------|--------|--------|-------|
| Ref Residue | N       | F      | S      | K       | A      | F     | R      | R      | R      | V     | V     | L      | D     | S       | S      | I      | K     |
| Alt Residue | K       | L      | R      | E       | V      | L     | G      | S      | H      | G     | M     | R      | G     | L       | N      | V      | T     |
| Inoculum    | 61.25%  | 63.24% | 52.82% | 0%      | 0%     | 0%    | 0%     | 43.85% | 55.01% | 0%    | 0%    | 0%     | 5.19% | 38.57%  | 46.13% | 0%     | 0%    |
| 13A12       | 100.00% | 99.94% | 0%     | 100.00% | 14.72% | 6.22% | 0%     | 0%     | 99.97% | 0%    | 0%    | 0%     | 0%    | 100.00% | 0%     | 0%     | 0%    |
| 13A12+ACE2  | 50.53%  | 52.66% | 0%     | 13.61%  | 0%     | 0%    | 45.28% | 0%     | 55.92% | 8.71% | 5.02% | 19.98% | 0%    | 44.31%  | 0%     | 21.69% | 5.37% |

**B**

| Position    | 74      | 79      | 247    | 354    | 389     | 484    | 685    | 685     | 808   | 813    | 982    |
|-------------|---------|---------|--------|--------|---------|--------|--------|---------|-------|--------|--------|
| Ref Residue | N       | F       | S      | N      | D       | E      | R      | R       | D     | S      | S      |
| Alt Residue | K       | L       | R      | D      | N       | K      | S      | H       | G     | L      | N      |
| Inoculum    | 61.25%  | 63.24%  | 52.82% | 0%     | 0%      | 0%     | 43.85% | 55.01%  | 5.19% | 38.57% | 46.13% |
| 8G9         | 99.99%  | 100.00% | 0%     | 99.92% | 100.00% | 98.89% | 0%     | 99.93%  | 0%    | 0%     | 0%     |
| 8G9-ACE2    | 100.00% | 99.96%  | 0%     | 0%     | 0%      | 0%     | 0%     | 100.00% | 5.82% | 0%     | 0%     |

Frequency  
<10%

Frequency  
10%<<50%

Frequency  
>50%

**C**

| Position    | 74      | 79      | 87      | 247    | 468     | 568    | 685    | 685    | 792    | 808   | 813    | 935   | 982    |
|-------------|---------|---------|---------|--------|---------|--------|--------|--------|--------|-------|--------|-------|--------|
| Ref Residue | N       | F       | N       | S      | I       | D      | R      | R      | P      | D     | S      | Q     | S      |
| Alt Residue | K       | L       | Y       | R      | T       | N      | S      | H      | T      | G     | L      | R     | N      |
| Inoculum    | 61.25%  | 63.24%  | 0%      | 52.82% | 0%      | 0%     | 43.85% | 55.01% | 0%     | 5.19% | 38.57% | 0%    | 46.13% |
| 10D4        | 100.00% | 100.00% | 100.00% | 0%     | 100.00% | 95.27% | 0%     | 99.88% | 0%     | 6.68% | 0%     | 0%    | 0%     |
| 10D4-ACE2   | 100.00% | 100.00% | 0%      | 0%     | 0%      | 0%     | 0%     | 0%     | 10.22% | 6.66% | 0%     | 9.05% | 0%     |

**Figure S5.** Mutations on the spike proteins of escaped viral population and passages 15<sup>th</sup> viral population of cocktails. (A) 13A12, (B) 8G9, and (C) 10D4 escaped viral population and p15 viral populations of corresponding cocktails were subjected to high-throughput sequencing. The RBD region is highlighted in blue.

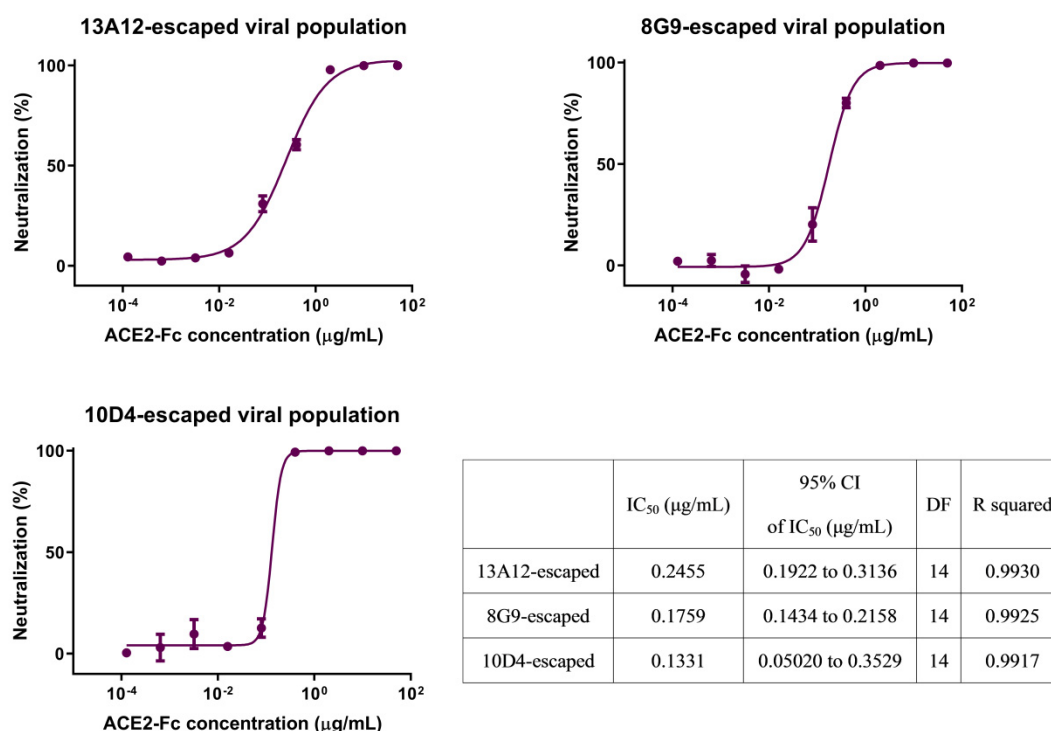

**Figure S6. ACE2-Fc efficiently neutralized 13A12-, 8G9-, and 10D4-escaped viral populations.** Escaped viral populations were harvested and neutralized using serially diluted ACE2-Fc, following by applying to Vero E6 cells to measure the GFP fluorescence by flow cytometry. Neutralization ratios were calculated based on the MFI values (mean±SD, N=2). IC<sub>50</sub> values were calculated by four parameter nonlinear regression fitting.

#### References for Supplementary Materials:

1. Starr, T.N.; Greaney, A.J.; Addetia, A.; Hannon, W.W.; Choudhary, M.C.; Dingens, A.S.; Li, J.Z.; Bloom, J.D. Prospective mapping of viral mutations that escape antibodies used to treat COVID-19. *Science* **2021**, *371*, 850-854, doi:10.1126/science.abf9302.
2. Baum, A.; Fulton, B.O.; Wloga, E.; Copin, R.; Pascal, K.E.; Russo, V.; Giordano, S.; Lanza, K.; Negron, N.; Ni, M.; et al. Antibody cocktail to SARS-CoV-2 spike protein prevents rapid mutational escape seen with individual antibodies. *Science* **2020**, *369*, 1014-1018, doi:10.1126/science.abd0831.
3. Rappazzo, C.G.; Tse, L.V.; Kaku, C.I.; Wrapp, D.; Sakharkar, M.; Huang, D.; Deveau, L.M.; Yockachonis, T.J.; Herbert, A.S.; Battles, M.B.; et al. Broad and potent activity against SARS-like viruses by an engineered human monoclonal antibody. *Science* **2021**, *371*, 823-829, doi:10.1126/science.abf4830.
4. Greaney, A.J.; Loes, A.N.; Crawford, K.H.D.; Starr, T.N.; Malone, K.D.; Chu, H.Y.; Bloom, J.D. Comprehensive mapping of mutations in the SARS-CoV-2 receptor-binding domain that affect recognition by polyclonal human plasma antibodies. *Cell Host Microbe* **2021**, *29*, 463-476.e466, doi:10.1016/j.chom.2021.02.003.
5. Dong, J.; Zost, S.J.; Greaney, A.J.; Starr, T.N.; Dingens, A.S.; Chen, E.C.; Chen, R.E.; Case, J.B.; Sutton, R.E.; Gilchuk, P.; et al. Genetic and structural basis for SARS-CoV-2 variant neutralization by a two-antibody cocktail. *Nat Microbiol* **2021**, *6*, 1233-1244, doi:10.1038/s41564-021-00972-2.
6. Liu, Z.; VanBlargan, L.A.; Bloyet, L.M.; Rothlauf, P.W.; Chen, R.E.; Stumpf, S.; Zhao, H.; Errico,

- J.M.; Theel, E.S.; Liebeskind, M.J.; et al. Identification of SARS-CoV-2 spike mutations that attenuate monoclonal and serum antibody neutralization. *Cell Host Microbe* **2021**, *29*, 477-488.e474, doi:10.1016/j.chom.2021.01.014.
7. McCallum, M.; Bassi, J.; De Marco, A.; Chen, A.; Walls, A.C.; Di Iulio, J.; Tortorici, M.A.; Navarro, M.J.; Silacci-Fregni, C.; Saliba, C.; et al. SARS-CoV-2 immune evasion by the B.1.427/B.1.429 variant of concern. *Science* **2021**, *373*, 648-654, doi:10.1126/science.abi7994.
